# Supplementary material for: Polysomes of Trypanosoma brucei: Association with Initiation Factors and RNA-Binding Proteins
Source: PubMed Central journal article supplement (PMC4545788; doi:10.1371/journal.pone.0135973), 2015-08-19

**A**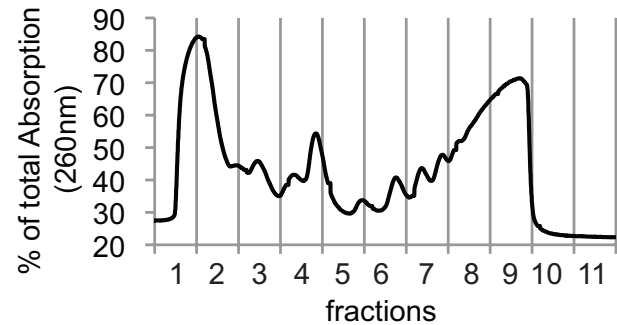

| loading ( $\mu$ l) | 3 | 10 | 10 | 30 |   |   |   |   |   |    |    |
|--------------------|---|----|----|----|---|---|---|---|---|----|----|
| fractions          | 1 | 2  | 3  | 4  | 5 | 6 | 7 | 8 | 9 | 10 | 11 |

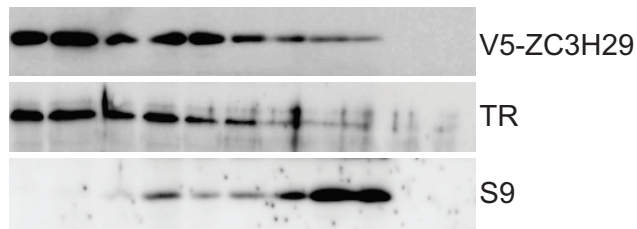**B**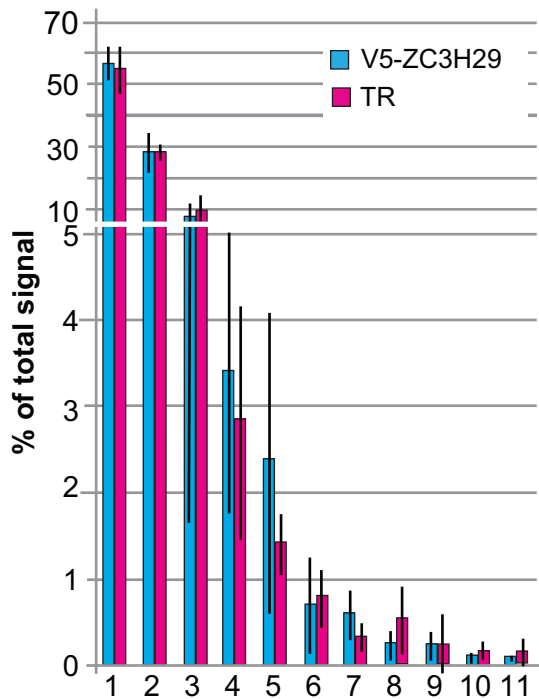

Supplement: pone.0135973.s001.pdf [file pone.0135973.s001.pdf]
