# Supplementary material for: Polysomes of Trypanosoma brucei: Association with Initiation Factors and RNA-Binding Proteins
Source: PubMed Central journal article supplement (PMC4545788; doi:10.1371/journal.pone.0135973), 2015-08-19

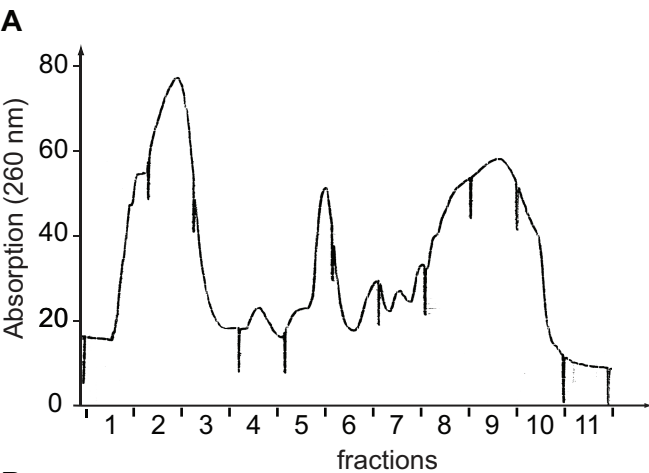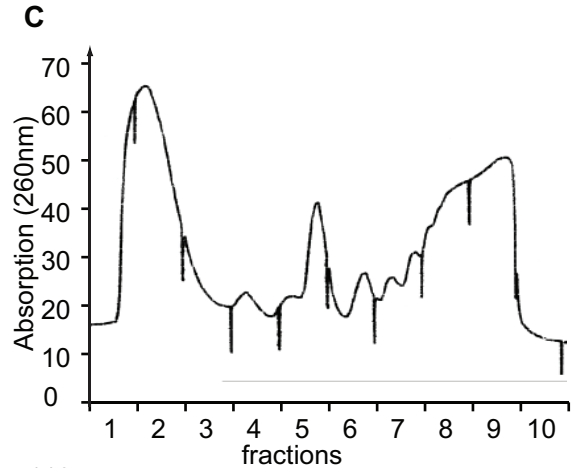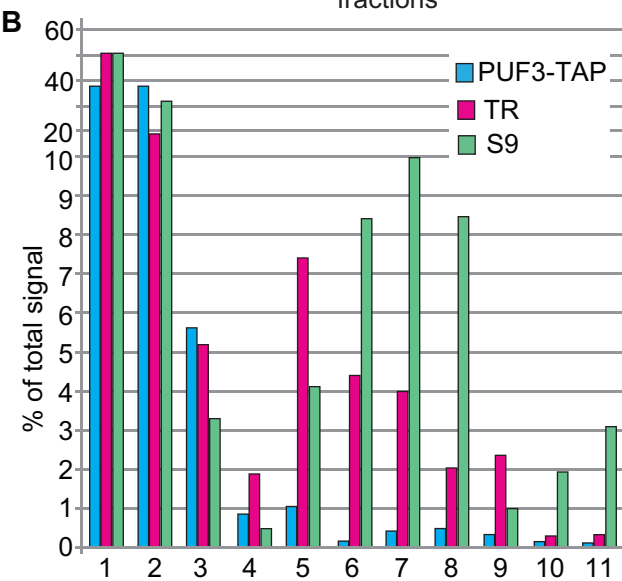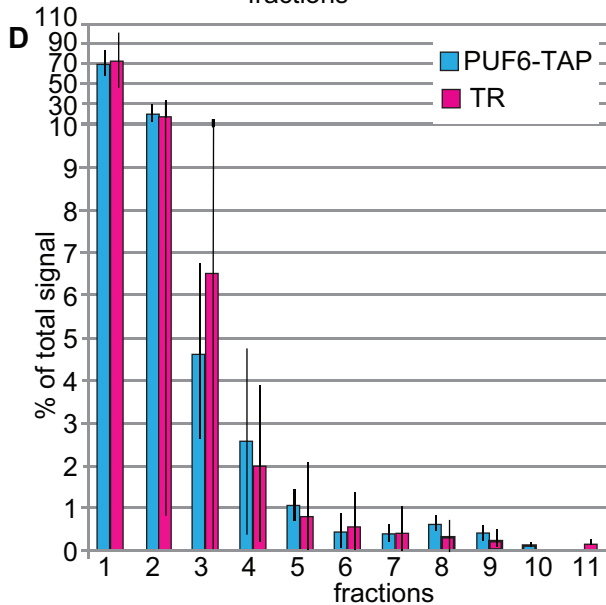

Supplement: pone.0135973.s002.pdf [file pone.0135973.s002.pdf]
